# Supplementary material for: Dataset on Vietnamese students’ impulse buying behavior on TikTok shop
Source: PubMed Central journal article supplement — Data Brief. 2024 Oct 18;57:111047. doi: 10.1016/j.dib.2024.111047 (PMC11546432; doi:10.1016/j.dib.2024.111047), 2024-10-18
Supplement: mmc1.pdf [file mmc1.pdf]

# Questionnaire

## **Topic: Factors influencing the impulse buying behavior of students on TikTok Shop**

Hello everyone,

Our team at FPT University – Can Tho Campus is currently conducting a study on the factors influencing the impulse buying behavior of students on TikTok Shop. We kindly request a few minutes of your time to complete the survey below. We assure you that all personal information collected will remain completely confidential and will be used solely for research purposes.

To ensure the authenticity of our findings, we hope you will respond honestly and accurately, selecting the options that best reflect your experiences. This will greatly assist us in our research efforts.

Our team sincerely thanks you and looks forward to your enthusiastic participation!

### **1. Screening question**

Please let us know if you have ever shopped on TikTok Shop?

- Ever (Continue the survey)
- Never (Stop the survey)

### **2. Measure the level of evaluation of factors affecting online impulsive buying behavior on TikTok Shop**

(1: Very disagree → 5: Very agree)

#### **2.1. Scarcity (SC)**

| Code | Items                                                                                   | Very disagree | Disagree | Normal | Agree | Very agree |
|------|-----------------------------------------------------------------------------------------|---------------|----------|--------|-------|------------|
| SC1  | You think about the deadline for a promotion I can buy on TikTok Shop.                  |               |          |        |       |            |
| SC2  | You are worried about the remaining time of the promotion when shopping on TikTok Shop. |               |          |        |       |            |
| SC3  | You think about the limited quantity of that product when shopping on TikTok Shop.      |               |          |        |       |            |
| SC4  | You are worried about out of stock when shopping on TikTok Shop.                        |               |          |        |       |            |

#### **2.2. Serendipity Information (SI)**

| Code | Items                                                                                  | Very disagree | Disagree | Normal | Agree | Very agree |
|------|----------------------------------------------------------------------------------------|---------------|----------|--------|-------|------------|
| SI1  | You happened to see a product you wanted to buy before, while shopping on TikTok Shop. |               |          |        |       |            |
| SI2  | You find things that will surprise you when you shop on TikTok Shop.                   |               |          |        |       |            |
| SI3  | You get more than you expect when you shop on TikTok Shop.                             |               |          |        |       |            |

|     |                                                                                                |  |  |  |  |  |
|-----|------------------------------------------------------------------------------------------------|--|--|--|--|--|
| SI4 | TikTok Shop gives you fresh information while shopping.                                        |  |  |  |  |  |
| SI5 | TikTok Shop gives you information relevant to the product you want to buy in a surprising way. |  |  |  |  |  |

### **2.3. Trust (TR)**

| Code | Items                                                                                      | Very disagree | Disagree | Normal | Agree | Very agree |
|------|--------------------------------------------------------------------------------------------|---------------|----------|--------|-------|------------|
| TR1  | You trust that there is no risk when shopping on TikTok Shop.                              |               |          |        |       |            |
| TR2  | You trust that online shopping on TikTok Shop can be trusted.                              |               |          |        |       |            |
| TR3  | You trust that TikTok Shop offers a variety of products that meet my needs.                |               |          |        |       |            |
| TR4  | You trust that TikTok Shop sells products honestly.                                        |               |          |        |       |            |
| TR5  | You trust that the quality of products on TikTok Shop matches the description information. |               |          |        |       |            |

### **2.4. Hedonic Motivation (HM)**

| Code | Items                                                                                           | Very disagree | Disagree | Normal | Agree | Very agree |
|------|-------------------------------------------------------------------------------------------------|---------------|----------|--------|-------|------------|
| HM1  | Shopping on TikTok Shop helps you relax and reduce stress.                                      |               |          |        |       |            |
| HM2  | You will be more motivated to shop if the product is discounted or promoted on TikTok Shop.     |               |          |        |       |            |
| HM3  | You will be more motivated to shop when you buy products as gifts or for others on TikTok Shop. |               |          |        |       |            |

### **2.5. Shopping Lifestyle (SL)**

| Code | Items                                                                                                     | Very disagree | Disagree | Normal | Agree | Very agree |
|------|-----------------------------------------------------------------------------------------------------------|---------------|----------|--------|-------|------------|
| SL1  | The product has similarities with products from famous brands, so it makes you buy faster on TikTok Shop. |               |          |        |       |            |
| SL2  | Because it is a newly launched product, it makes you buy faster on TikTok Shop.                           |               |          |        |       |            |
| SL3  | Because this is a product from a famous brand, it is easier for you to buy on TikTok Shop.                |               |          |        |       |            |
| SL4  | Products with differences in design and shape make it easier for you to buy on TikTok Shop.               |               |          |        |       |            |

### 2.6. Product Presentation (PP)

| Code | Items                                                                                                                      | Very disagree | Disagree | Normal | Agree | Very agree |
|------|----------------------------------------------------------------------------------------------------------------------------|---------------|----------|--------|-------|------------|
| PP1  | Products on TikTok Shop are fully described with information to help you make a quick buying decision.                     |               |          |        |       |            |
| PP2  | Product illustrations on TikTok Shop are of high quality, attracting you to make a quick purchase.                         |               |          |        |       |            |
| PP3  | Illustrations of products on TikTok Shop are depicted from many different angles to help you make an easy buying decision. |               |          |        |       |            |
| PP4  | Suggested information related to products on TikTok Shop is rich and diverse to help you make buying decisions easily.     |               |          |        |       |            |

### 2.7. Online impulse buying (OIB)

| No.  | Items                                                                     | Very disagree | Disagree | Normal | Agree | Very agree |
|------|---------------------------------------------------------------------------|---------------|----------|--------|-------|------------|
| OIB1 | Before visiting TikTok Shop, you had no plans to buy the product.         |               |          |        |       |            |
| OIB2 | While browsing TikTok Shop, you have no intention of buying this product. |               |          |        |       |            |
| OIB3 | Buying products on TikTok Shop, comes spontaneous to you.                 |               |          |        |       |            |

### 3. Respondent information

Full name: ..... Birth year: .....

Email: ..... Province/City (Code in the raw data: Q1): .....

Please indicate your gender (Code in the raw data: Q2)

- Female (0)
- Male (1)

The name of the school where you are currently studying is (Code in the raw data: Q3):

- Can Tho FPT University (1)
- Can Tho University (2)
- Can Tho Medicine and Pharmacy University (3)
- Nam Can Tho University (4)
- Can Tho College (5)
- College of Medicine (6)
- Can Tho FPT Polytechnic College (7)
- Others (8)

What is your average monthly income? (*Code in the raw data: Q4*)

- Under 3 million (1)
- From 3 - 5 million (2)
- From 5 - 10 million (3)
- Over 10 million (4)

Thank you for your answers!
